# Supplementary material for: Low temperature solution-processed high performance photodiode based on Si–ZnO core–shell structure
Source: Royal Society of Chemistry journal article supplement (doi:10.1039/c3cp43083a), 2013-01-01
Supplement: c3cp43083a.pdf [file c3cp43083a.pdf]

## Supplementary Information

Low Temperature Solution-Processed High Performance Photodiode

Based on Si/ZnO Core/Shell Structure

Dong Liu, Xiaojuan Shen, Tao Song, Hu Jia and Baoquan Sun\*

Jiangsu Key Laboratory for Carbon-Based Functional Materials & Devices, Institute of Functional Nano & Soft Materials (FUNSOM), Soochow University, 199 Ren'ai Road, Suzhou, 215123, China

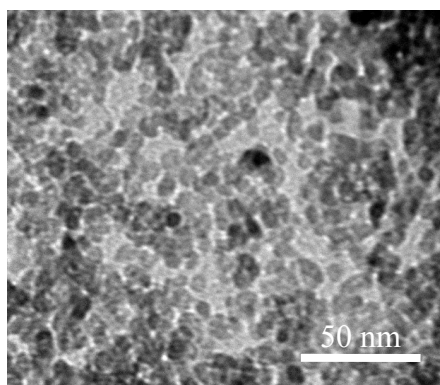

Fig. S1 The TEM image of ZnO nanoparticles.

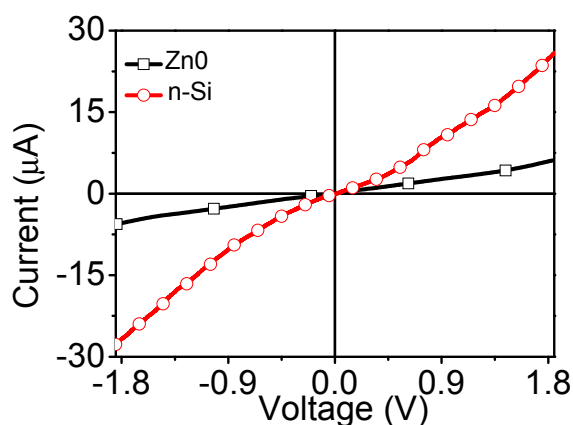

Fig. S2 The I-V Ohmic contact characteristics of Cu/ZnO and In:Ga/n-Si junctions, respectively.

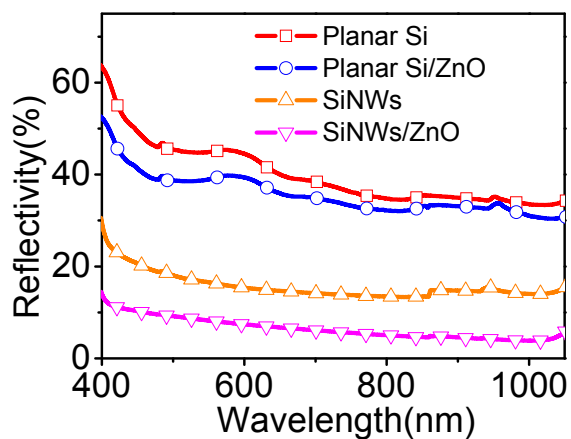

Fig. S3 The reflectance spectra of bare planar silicon substrate, planar silicon substrate coated with ZnO nanoparticles, SiNWs on silicon substrate and SiNWs on silicon substrate coated with ZnO nanoparticles, respectively

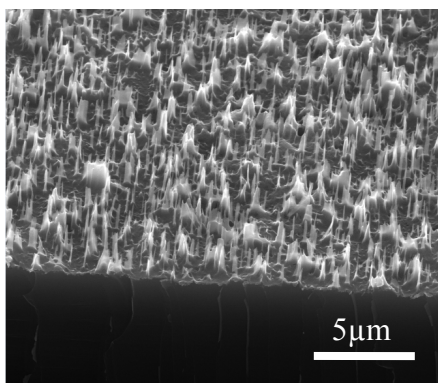

Fig. S4 The SEM of the Si/ZnO (spin-coated film) heterojunction.
